# Supplementary material for: In Silico Approaches for the Identification of Aptamer Binding Interactions to Leptospira spp. Cell Surface Proteins
Source: MDPI journal article supplement (doi:10.3390/tropicalmed8020125), 2023-02-18
Supplement: s1 [file s1]

# Supplementary Material: In Silico Approaches for the Identification of Aptamer Binding Interactions to *Leptospira* spp. Cell Surface Proteins

Chembie A. Almazar <sup>†</sup>, Marjo V. Mendoza <sup>†</sup> and Windell L. Rivera <sup>\*</sup>

Pathogen-Host-Environment Interactions Research Laboratory, Institute of Biology, College of Science, University of the Philippines Diliman, Quezon City 1101, Philippines; caalmazar@up.edu.ph (C.A.A.); mvmendoza3@up.edu.ph (M.V.M.)

<sup>\*</sup> Correspondence: wlrivera@science.upd.edu.ph

<sup>†</sup> These authors contributed equally to this work.

**Table S1.** Aptamer–protein interaction profiles.

| Aptamer | Protein  | No. of hydrophobic interactions | No. of hydrogen bonds | Total no. of interactions |
|---------|----------|---------------------------------|-----------------------|---------------------------|
| AP1     | HylX     | 2                               | 13                    | 15                        |
| AP1     | LIC12575 | 0                               | 12                    | 12                        |
| AP1     | LIC20151 | 4                               | 10                    | 14                        |
| AP1     | LigA     | 0                               | 18                    | 18                        |
| AP1     | LipL21   | 0                               | 12                    | 12                        |
| AP1     | LipL32   | 1                               | 23                    | 24*                       |
| AP1     | LipL41   | 1                               | 13                    | 14                        |
| AP1     | LipL71   | 2                               | 20                    | 22*                       |
| AP1     | Loa22    | 3                               | 10                    | 13                        |
| AP1     | OmpL1    | 1                               | 10                    | 11                        |
| AP1     | Smc      | 3                               | 12                    | 15                        |
| Total   |          | 17                              | 153                   | 170                       |
| AP3     | HylX     | 3                               | 10                    | 13                        |
| AP3     | LIC12575 | 1                               | 9                     | 10                        |
| AP3     | LIC20151 | 1                               | 17                    | 18                        |
| AP3     | LigA     | 3                               | 16                    | 19                        |

|       |          |    |     |     |
|-------|----------|----|-----|-----|
| AP3   | LipL21   | 0  | 6   | 6   |
| AP3   | LipL32   | 0  | 8   | 8   |
| AP3   | LipL41   | 3  | 9   | 12  |
| AP3   | LipL71   | 1  | 12  | 13  |
| AP3   | Loa22    | 3  | 22  | 25* |
| AP3   | OmpL1    | 1  | 17  | 18* |
| AP3   | Smc      | 1  | 16  | 17  |
| Total |          | 17 | 142 | 159 |
| AP5   | HylX     | 3  | 13  | 16  |
| AP5   | LIC12575 | 1  | 16  | 17  |
| AP5   | LIC20151 | 3  | 19  | 22  |
| AP5   | LigA     | 2  | 12  | 14  |
| AP5   | LipL21   | 2  | 11  | 13  |
| AP5   | LipL32   | 0  | 16  | 16  |
| AP5   | LipL41   | 1  | 16  | 17* |
| AP5   | LipL71   | 0  | 12  | 12  |
| AP5   | Loa22    | 3  | 14  | 17  |
| AP5   | OmpL1    | 3  | 6   | 9   |
| AP5   | Smc      | 2  | 17  | 19  |
| Total |          | 20 | 152 | 172 |
| AP10  | HylX     | 2  | 12  | 14  |
| AP10  | LIC12575 | 0  | 13  | 13  |
| AP10  | LIC20151 | 3  | 1   | 4   |
| AP10  | LigA     | 1  | 15  | 16  |
| AP10  | LipL21   | 3  | 8   | 11  |
| AP10  | LipL32   | 2  | 17  | 19  |

---

|       |        |    |     |     |
|-------|--------|----|-----|-----|
| AP10  | LipL41 | 2  | 13  | 15  |
| AP10  | LipL71 | 0  | 19  | 19  |
| AP10  | Loa22  | 2  | 9   | 11  |
| AP10  | OmpL1  | 3  | 11  | 14  |
| AP10  | Smc    | 2  | 17  | 19* |
| Total |        | 20 | 135 | 155 |

---

\*Highest number of interacting residues for each protein.
